# Supplementary material for: Homeostatic Interplay between Bacterial Cell-Cell Signaling and Iron in Virulence
Source: PLoS Pathog. 2010 Mar 12;6(3):e1000810. doi: 10.1371/journal.ppat.1000810 (PMC2837411; doi:10.1371/journal.ppat.1000810)
Supplement: Table S3 — The interplay between the pqs operon and iron. The mvfR regulon components controlling (A) or controlled by (B) iron related regulators. (A) The data was adapted from Table S1. The values represent fold changes in the pqsE − mutant vs. PA14 (pqsE −), mvfR − vs. PA14 (mvfR −), mvfR − harboring pDN19pqsE vs. mvfR − + pDN19 (mvfR − + PqsE), mvfR − + PqsE treated with PQS (20 mg/L) vs. untreated (mvfR − + PqsE + PQS) and PA14 harboring pDN19pqsE vs. PA14 with pDN19 (PA14 + PqsE). (B) Iron related regulators controlling the MvfR regulon component. Fold change in expression of mvfR, pqsA-E and phnAB were retrieved from previously published studies of iron-related conditions and regulators 1 [37], 2 [36], 3 [62], 4 [63]. (0.07 MB XLS) [file ppat.1000810.s009.xls]

## Sheet: Iron genes
A. Iron related genes that are co-regulated by the mvfR regulon
PA14 orthologs	ID (PAO1)	Gene name	pqsE-	mvfR- + PqsE	PA14 + PqsE	mvfR- + PqsE + PQS	PA14 + PqsE vs. mvfR- + PqsE	Iron starved cells + iron 1	low versus high iron 2	vqsR 3	PA2384 4	Description
Positively regulated
PA14_58040	PA4225_pchF_at	pchF	-277.1		-12.4378			-27.7	55		−37.59	pyochelin synthetase
PA14_03520	PA4221_fptA_at	fptA	-161.2	4.785	-5.98802	-3.55872	-3.479	-19.1	55	27.22	−22.61	Fe(III)-pyochelin receptor precursor
PA14_61200	PA4226_pchE_at	pchE	-122.1	3.714	-14.1044		-3.302	-13.3	55		−85.00	EntF, Non-ribosomal peptide synthetase modules
PA14_34870	PA4222_at	pchI	-111.7		-9.43396			-9.8	55		−26.77	MdlB, ABC-type multidrug transport system
PA14_53250	PA4230_pchB_at	pchB	-90.32		-8.92857		-2.203	-30.1	124		−13.47	salicylate biosynthesis protein PchB
PA14_55780	PA4231_pchA_at	pchA	-80.47	3.05	-9.00901			-24.9	124	30.45	−39.92	MenF, Isochorismate synthase
PA14_21530	PA4223_at	pchH	-40.02		-6.13497			-11.9	55		−8.99	MdlB, ABC-type multidrug transport system
PA14_14740	PA3813_iscU_at	iscU	-6.852	5.154		-5.37634	-3.695					probable iron-binding protein IscU
PA14_14750	PA3812_iscA_at	iscA	-6.748	4.087		-3.58423	-2.411		4			probable iron-binding protein IscA
PA14_06170	PA0471_at	fiuR	-2.88	4.759				-19.4	46	9.32		FecR, Fe2+-dicitrate sensor, membrane component
PA14_32720	PA2467_at	foxR	-2.748	11.59			-2.622	-18.9	30			FecR, Fe2+-dicitrate sensor, membrane component
PA14_60500	PA4227_pchR_at	pchR	-2.733	2.744	-4.01606		-2.001		37	19.31	−2.5	transcriptional regulator PchR
PA14_68440	PA4228_pchD_at	pchD	-2.721	5.17	-20.2429		-4.192	-25.6	124		−78.18	pyochelin biosynthesis protein PchD
PA14_58580	PA4515_at	piuC ;	-2.185	3.588			-2.5	-5	36			piuC, putative iron-uptake factor
PA14_62330	PA4709_at	phuS	-2.138	5.362			-2.828	-12.1	12	6.53	−3.09	HemS, Putative heme degradation protein
PA14_64460	PA4229_pchC_at	pchC	-2.076		-13.7363		-2.286	-24.3	124	14.9	−61.64	pyochelin biosynthetic protein PchC
PA14_18670	PA3531_bfrB_at	bfrB	-0.128	-14.0449	8.576	4.776	5.88235	24			5.44	bacterioferritin, bfrB (bacterioferritin)
PA14_47380	PA1302_at	hxuC ;		2.09				-7.7				probable heme utilization protein precursor
PA14_53880	PA0801_at			2.257				-5				hypothetical protein
PA14_61850	PA4675_at	optH		2.534				-10.3				probable TonB-depe ent receptor
PA14_47390	PA1301_at			2.545			-2.204		46	7.34		probable transmembrane sensor
PA14_62280	PA4706_at	phuV ;		2.76				-3.7				probable ATP-bi ing component of ABC transporter
PA14_10200	PA4156_at			3.075				-28.8				probable TonB-depe ent receptor
PA14_20000	PA3409_at			3.082					40			probable transmembrane sensor
PA14_62350	PA4710_at	phuR		3.203			-3.018	-47.9	7		−3.52	probable outer membrane hemin receptor
PA14_20010	PA3408_hasR_at	hasR		3.346			-2.045	-21.4	70			heme acquisition protein HasR
PA14_13450	PA3900_at			3.491				-5.5	13	6.71		probable transmembrane sensor
PA14_10180	PA4158_fepC_at	fepC		3.834			-2.603		10	20.26		ferric enterobactin transport protein FepC
PA14_64710	PA4897_at	optI ;		3.889			-2.686	-3.1	5	5.4		hypothetical protein
PA14_09970	PA4168_at	fpvB		3.958	9.73			-20.1				probable TonB-depe ent receptor
PA14_52230	PA0931_at	pirA		4.64			-2.327	-42.7		38.93		siderophore receptor protein
PA14_29350	PA2688_pfeA_at	pfeA		5.2			-2.402	-16.7		53.86		ferric enterobactin receptor precursor PfeA
PA14_33690	PA2397_pvdE_at	pvdE		5.574			-2.047		33		−7.64	pyoverdine biosynthesis protein PvdE
PA14_55580	PA0672_at	hemO		5.972			-4.483		138	5.75	−9.64	hypothetical protein
PA14_64690	PA4895_at			6.303		-5.07614	-9.533		20	9.62		FecR, Fe2+-dicitrate sensor, membrane component
PA14_13430	PA3901_fecA_at	fecA		21.8			-4.472		6			Fe(III) dicitrate transport protein FecA
PA14_33260	PA2426_pvdS_at	pvdS		48.69	-3.85		-30.93	-12.9	177		−7.25	sigma factor PvdS
PA14_33270	PA2425_at	pvdG				5.525		-3.8	34		−8.05	probable thioesterase
PA14_33280	PA2424_at	pvdL				4.508		-2.8	34		−7.85	probable non-ribosomal peptide synthetase
PA14_33500	PA2413_at	pvdH				3.492	2.163		65		−10.55	probable class III aminotransferase
PA14_33650	PA2399_pvdD_at	pvdD				3.13	2.147		19		−4.19	pyoverdine synthetase D
PA14_33680	PA2398_fpvA_at	fpvA			-3.19	4.071			35		−2.57	ferripyoverdine receptor, fpvA (ferripyoverdine receptor)
PA14_33830	PA2384_at					7.743		-2.4	148			hypothetical protein
Negatively regulated
PA14_33820	PA2385_at	pvdQ	2.07469			6.047		-6	11			homoserine lactonase
PA14_33810	PA2386_pvdA_at	pvdA	2.10526			24.13		-6.5	216		−19.03	L-ornithine N5-oxygenase, pvdA
PA14_33720	PA2394_at	pvdN	2.1978			3.129			38		−3.77	probable aminotransferase
PA14_33710	PA2395_at	pvdO	2.55102			3.805			38		−2.88	hypothetical protein
PA14_33700	PA2396_at	pvdF	2.95858			4.282			33		−6.73	hypothetical protein
PA14_33630	PA2400_at	pvdJ		-3.58		16			30			probable non-ribosomal peptide synthetase
B The effect of iron related regulators on mvfR, phnAB and pqsA-E.
Gene name	low versus high iron 2	pvdS low vs PAO1 low iron 2	vqsR 3	PA2384 OD 2 4
pqsA			-15.7	4.95
pqsB			-23.17	3.14
pqsC			-55.21	16.63
pqsD			-12.18	4.73
pqsE			-11.98	14.41
phnA			-15.77	3.01
phnB			-10.96	9.51
mvfR	3	4
